# Supplementary material for: BAD-LAMP controls TLR9 trafficking and signalling in human plasmacytoid dendritic cells
Source: PubMed Central journal article supplement (PMC5640662; doi:10.1038/s41467-017-00695-1), 2017-10-13
Supplement: 41467_2017_695_MOESM1_ESM.pdf [file 41467_2017_695_MOESM1_ESM.pdf]

**Description of Supplementary Files**

File Name: Supplementary Information

Description: Supplementary figures, supplementary tables

File Name: Peer Review File

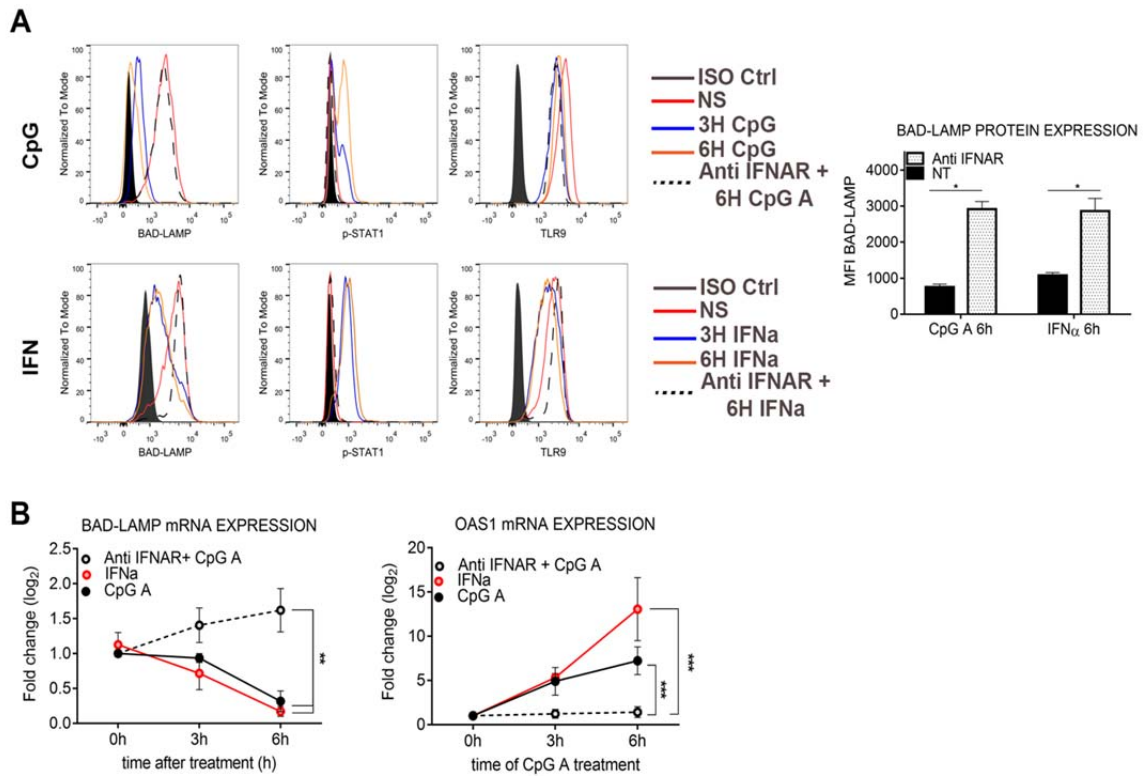

**Supplementary Figure 1: Exposure to IFN down-modulates BAD-LAMP levels.**

A. *Left*) Histogram plots from FACS intracellular staining of BAD-LAMP, phosphorylated-STAT1 and TLR9 in CAL-1 at steady state (red line), 3h (blue line), 6h (orange line) after CpG A (upper row) or IFN  $\alpha$  (bottom row) stimulations. Pre-treatment for 1h with anti-IFNAR blocking antibody was used to block IFN signaling (dashed line). Full grey histogram represents isotype control. Data are representative for 3 independent experiments minimum. *Right*) Levels of BAD-LAMP as MFI from FACS intracellular staining on CAL-1 stimulated with CpG A or IFN- $\alpha$  for 6h with (dashed) or without (black) IFNAR blocking antibodies. Data +/- SD from 3 independent experiments. B. BAD-LAMP (left) and OAS1 (ISG, right) mRNA expression in CAL-1 stimulated with CpG A (black), IFN- $\alpha$  (red) and CpG A + anti-IFNAR antibody pretreatment (dashed) for indicated times. Raw data have been normalized to housekeeping gene (GAPDH) and graphic represents fold change +/- SD compared to non-stimulated cells from 3 independent experiments.

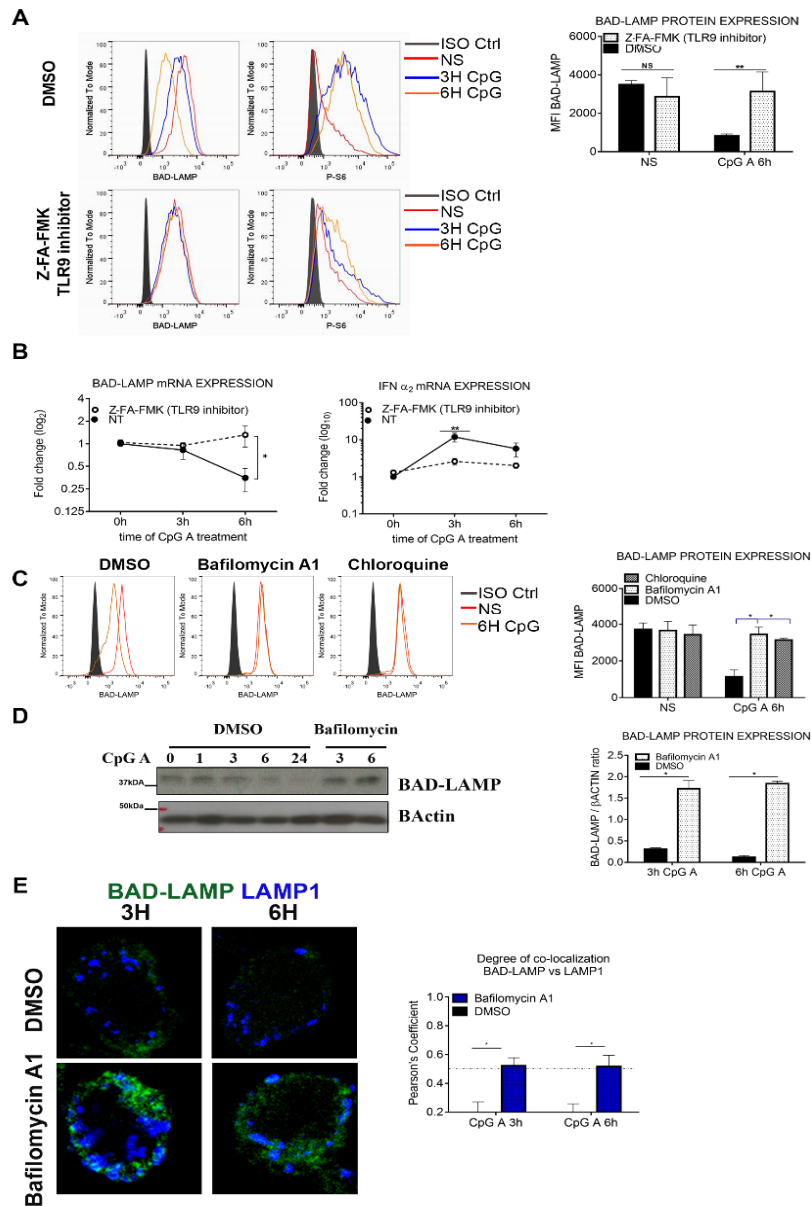

## Supplementary Figure 2: TLR9 inhibition and high endosomal pH abrogates BAD-LAMP down-modulation

A. *Left*) Histogram plots from FACS intracellular staining of BAD-LAMP and phosphorylated form of S6 ribosomal protein (used activation control) in CAL-1 at steady state (red line), 3h (blue line), 6h (orange line) after CpG A stimulation. Pre-treatment for 4h with protease inhibitor ZA-FA-FMK was used to block TLR9 signaling (bottom row). Full grey histogram represents isotype control. Data are representative for 3 independent experiments. *Right*) Levels of BAD-LAMP as MFI from FACS intracellular staining on CAL-1 at steady state or treated with CpG A 6h with (dashed) or without (black) ZA-FA-FMK pretreatment. Data +/- SD from 3 independent experiments. B. BAD-LAMP (left) and IFN $\alpha_2$  (right) mRNA expression in CAL-1 stimulated for indicated times with CpG A (black) or ZA-FA-FMK pretreatment (dashed). Raw data have been normalized to housekeeping gene (GAPDH) and graphics represent fold change +/- SD compared to non-stimulated cells from 3 independent experiments. C. *Left*) Histogram plots from FACS intracellular staining of BAD-LAMP in CAL-1 at steady state (red line) and 6h (orange line) after CpG A stimulation. Treatment with Bafilomycin A1 and Chloroquine was used to block Endosomal acidification. Full grey histogram represents isotype control. Data are representative for 2 independent experiments. *Right*) Levels of BAD-LAMP as MFI from FACS intracellular staining on CAL-1 at steady state or treated with CpG A 6h and Bafilomycin A1 (dashed), Chloroquine (Grey) or without any additional treatment (black). Data +/- SD from 2 independent experiments. D. *Left*) CAL-1 cells were treated with CpG A for indicated times with or without additional bafilomycin A1 treatment prior lysis and SDS PAGE treatment. Expression of BAD-LAMP was detected by immunoblot. Beta-actin is shown as loading control. *Right*) Quantification of IRF7 (red) and p65 (blue) phosphorylation levels. E. *Left*) ICM on CAL-1 cells treated or not with Bafilomycin A1 during indicated time of CpGA treatment. Imaging of BAD-LAMP and LAMP1 have been performed. *Right*) Quantification of BAD-LAMP protein expression by Image J pixel quantification. Graphics represents data normalized to Beta actin levels +/- SD from 2 independent experiments. \* P < 0.05 by unpaired Student's T test.

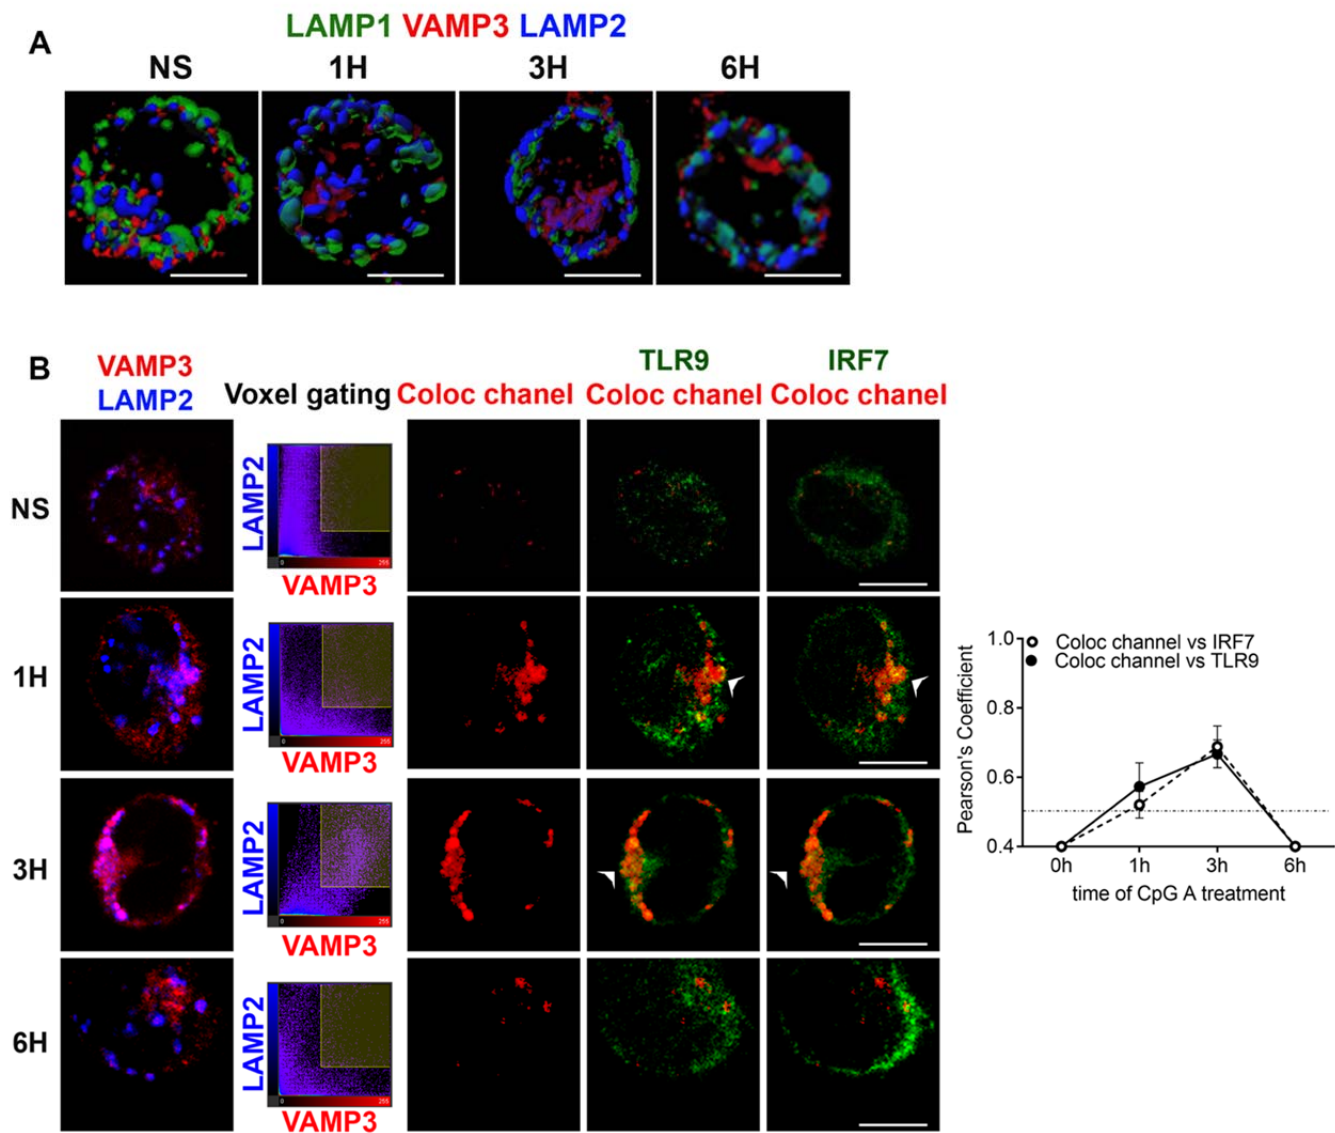

**Supplementary Figure 3: TLR9 and IRF7 are targeted to a VAMP3<sup>+</sup>/LAMP2<sup>+</sup> endocytic compartment.**

A. Immunofluorescence confocal microscopy of CAL-1 stimulated with CpG A for indicated times. Imaging for LAMP1, LAMP2 and VAMP3 was performed. Set of several images were acquired by Z stack follow by a deconvolution processing in order to perform a 3D reconstruction with Imaris Software. Picture are representative of of at least 3 independent experiments. Scale bars = 5µm. B .Left) Imaris voxel gating analysis of immunofluorescence confocal images of CAL-1 cells treated with CpG A for indicated times. Voxel gating was performed on LAMP2 (Blue) and VAMP3 (Red) channels to generate a "Coloc channel" picture only showing VAMP3<sup>+</sup>/LAMP2<sup>+</sup> compartment. This new "Coloc channel" was then merged with single TLR9 and IRF7 staining to obtained simplified tri-localization images, revealing that both TLR9 and IRF7 co-localize with VAMP3<sup>+</sup>/LAMP2<sup>+</sup> compartment after of CpG A exposure. Arrowheads indicate co-localization area. Scale bars = 5µm. (Right) Quantification of the co-localisation between VAMP3<sup>+</sup>/LAMP2<sup>+</sup> compartment (coloc channel) and TLR9 (black line) or IRF7 (dashed line) after CpG A stimulation was performed by Pearson's coefficient measurement using ImageJ. Graphics represent Pearson's coefficient means of 25 different cells +/- SD for each time point from at least 3 independent experiments. \* P < 0.05 by unpaired Student's T test.

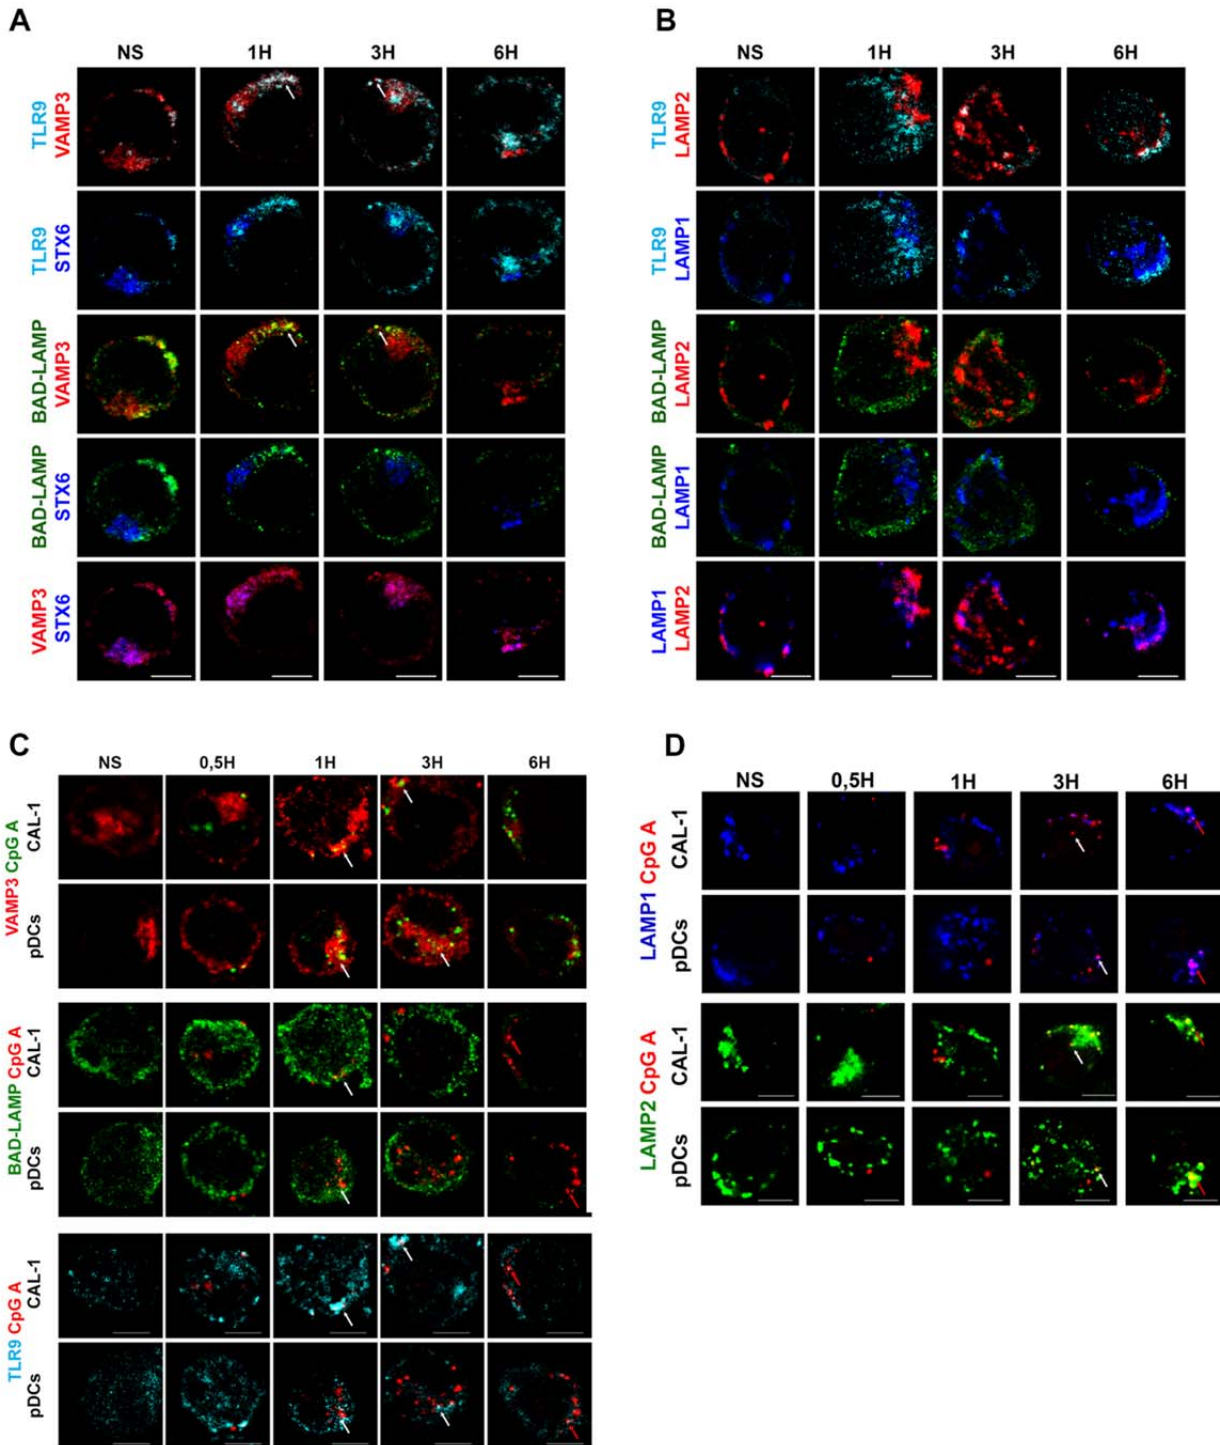

#### Supplementary Figure 4: TLR9 and BAD-LAMP traffic through a common endocytic route with CpG A.

A- Immunofluorescence confocal microscopy of CAL-1 stimulated with CpG A for indicated times. Imaging for TLR9, VAMP3 and Syntaxin 6 (STX6) was performed. Images are representative of at least 3 independent experiments. Arrowheads indicate co-localization area. Scale bars = 5µm. B. Immunofluorescence confocal microscopy of CAL-1 stimulated with CpG A for indicated times. Images for BAD-LAMP, TLR9, LAMP1 and LAMP2 localization are shown. Pictures are representative of at least 3 independent experiments. White arrows identify co-localization area. Scale bars = 5µm. C-D. Immunofluorescence confocal microscopy of CAL-1 treated with fluorescent CpG A for indicated times. Imaging for BAD-LAMP, VAMP3, TLR9 and CpG A (C) or LAMP1, LAMP2 and CpG A (D) was performed. Images are representative of at least 3 independent experiments. Arrows indicate co-localization area. Scale bars = 5µm. \* P < 0.05 by unpaired Student's T test.

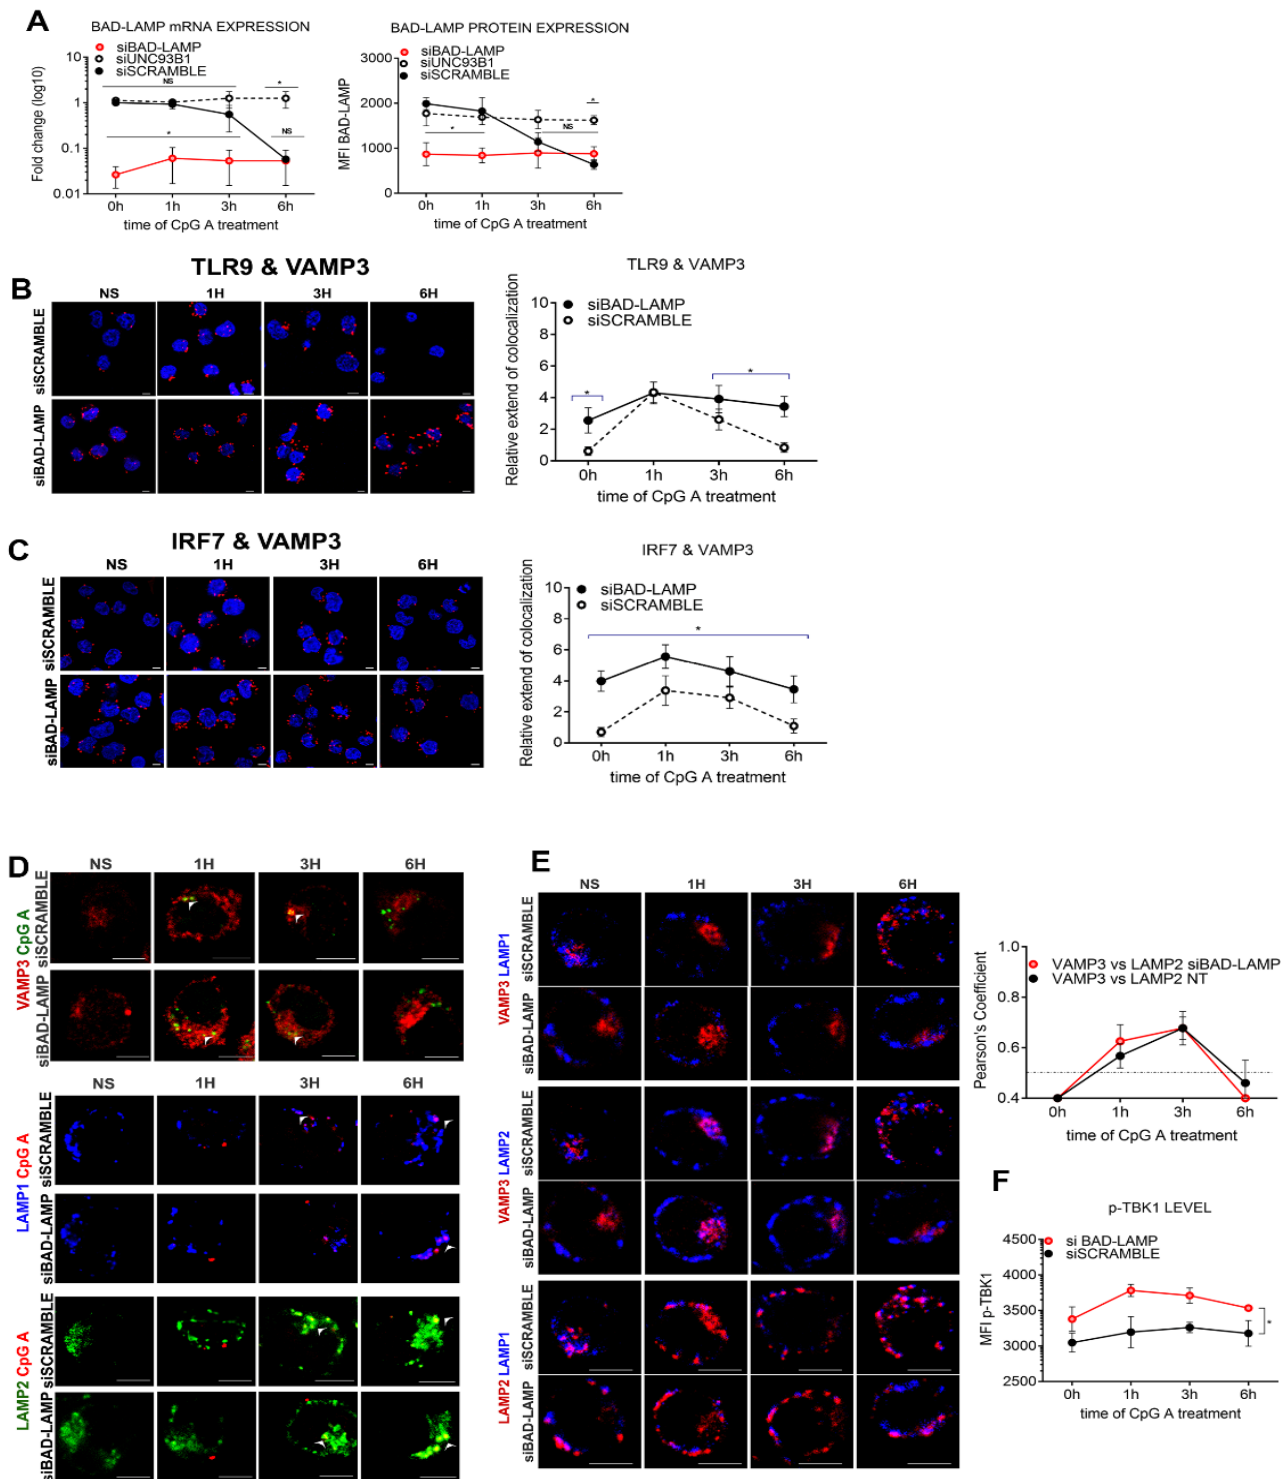

**Supplementary Figure 5: BAD-LAMP silencing leads to IRF7 accumulation on TLR9 containing VAMP3 endosomes.**

A. CAL-1 cells were electroporated with different siRNA (siSCRAMBLE, siBAD-LAMP and siUNC93B1) for 24hr before stimulation for indicated times with CpG. BAD-LAMP mRNA level was monitored by RT-QPCR. Raw data have been normalized to housekeeping gene (GAPDH) and graphic represents fold change +/- SD compared to non-stimulated cells from 3 independent experiments minimum. BAD-LAMP protein levels as MFI were monitored by intracellular FACS staining. Graphic represents means of MFI +/- SD from at least 3 independent experiments. B, C. (Left) Immunofluorescence proximity ligation assay (iPLA) on CAL-1 treated with control (scramble) siRNA or BAD-LAMP siRNA and then stimulated with CpG A for indicated times. Imaging TLR9 and VAMP3 (B), IRF7 and VAMP3 (C) are presented. Confocal images are representative of 2 independent experiments where the nucleus is stained by DAPI (blue) and proximity between proteins of interest is revealed by incorporation of labelled nucleotide (red). Scale bars = 5 $\mu$ m. (Right) Quantification of iPLA by counting the number of red dots normalized to nucleus numbers using imageJ.

Graphics represent means normalized value of 100 different cells +/- SD from  $n \geq 3$  independent experiments (dots/cell). D. Immunofluorescence confocal microscopy of CAL-1 treated with control (scramble) siRNA or BAD-LAMP siRNA and then stimulated with fluorescent CpG A for indicated times. Imaging of VAMP3 and CpG (top) or LAMP1, LAMP2 and CpGA (bottom) was performed.

Pictures are representative of  $n=3$  experiments. Arrows indicate co-localization area. Scale bars =  $5\mu\text{m}$ . E. Same as D, Imaging of VAMP. (Right) Quantification of VAMP3 and LAMP2 co-localisation at different time during CpG A stimulation was performed in mock transfected cells (black line as reference), upon BAD-LAMP silencing (red line). Graphics represent Pearson's coefficient means of 50 different cells +/- SD from  $n \geq 3$  independent experiments. F. Levels of phosphorylation of TBK1 as MFI from FACS intracellular staining on CAL-1 electroporated with si RNA scramble (black line) or si RNA targeting BADLAMP (red line) upon CpG A treatment. Data +/- SD from 2 independent experiments. \*  $P < 0.05$  by unpaired Student's T test.

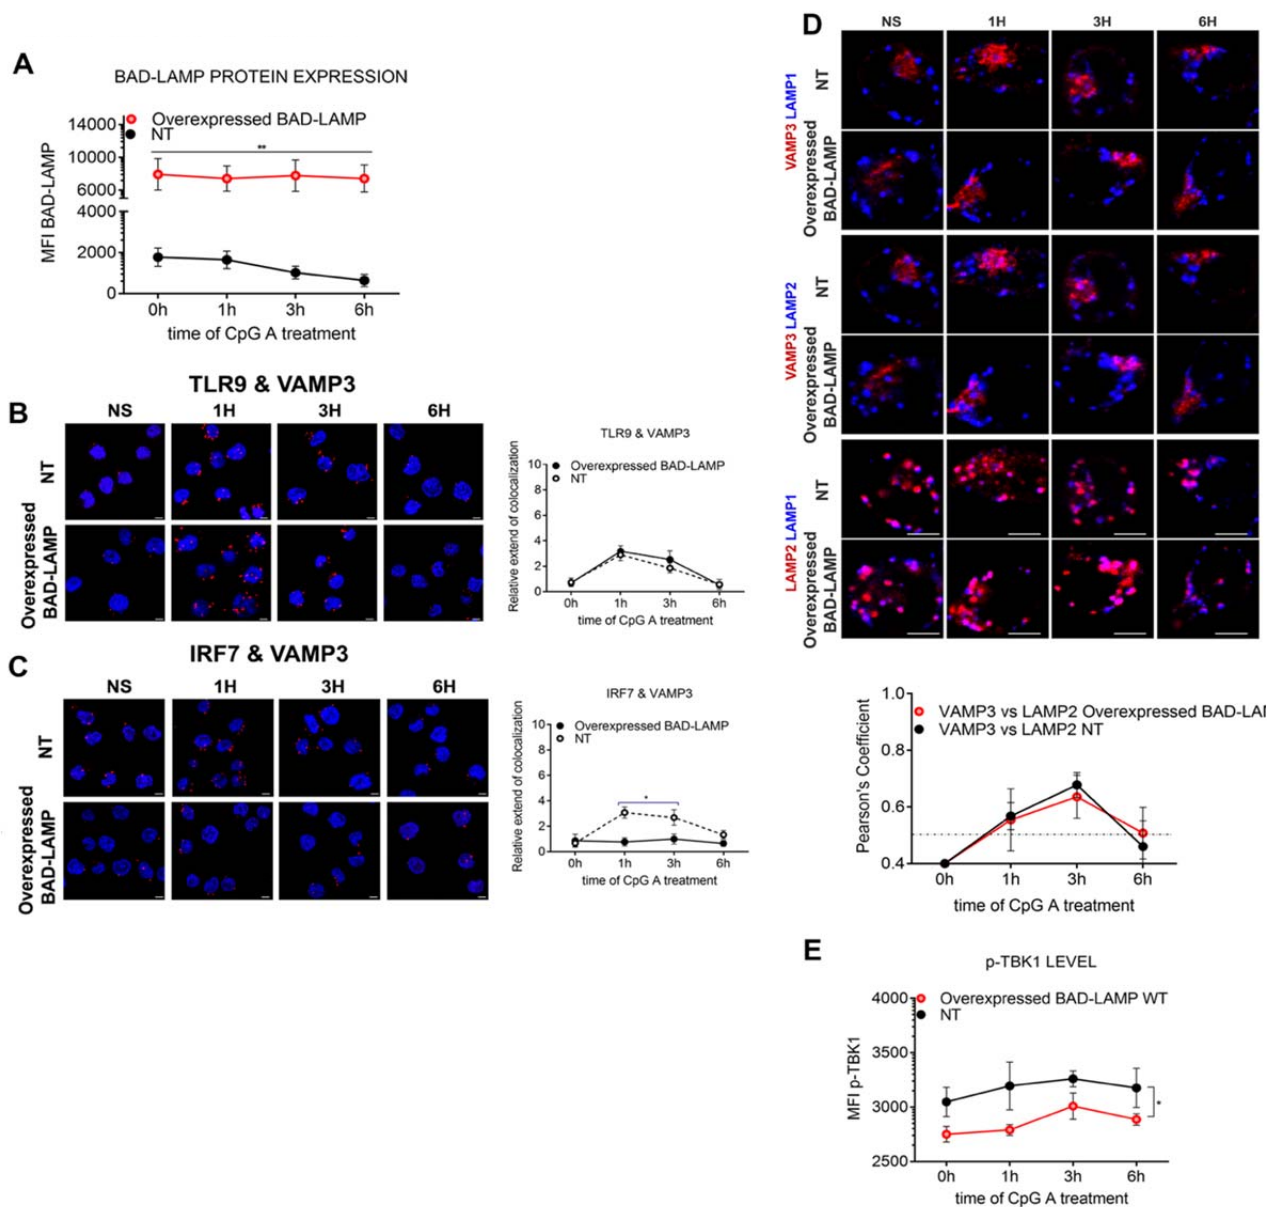

**Supplementary Figure 6: BAD-LAMP over-expression prevents IRF7 recruitment on TLR9 VAMP3-positive endosomes.**

A. CAL-1 cells were electroporated with BAD-LAMP mRNA or not (NT) during 6 hours prior stimulation for indicated times with CpG A. BAD-LAMP protein levels as MFI were monitored by intracellular FACS staining. Graphic represents means of MFI +/- SD from at least 3 independent experiments. B, C. (Left) Immunofluorescence proximity ligation assay (iPLA) on CAL-1 non electroporated (NT) or electroporated with BAD-LAMP mRNA and then stimulated with CpG A for indicated times. Imaging TLR9 and VAMP3 (B) IRF7 and VAMP3 (C) are presented. Confocal images are representative of 2 independent experiments where the nucleus is stained by DAPI (blue) and proximity between proteins of interest is revealed by incorporation of labelled nucleotide during PCR reaction (red). Scale bars = 5µm. (Right) Quantification of iPLA by counting the number of red dots normalized to nucleus numbers using imageJ. Graphics are representing means normalized value of 100 different cells +/- SD from at least 3 independent experiments (dots/cell). D.(Left)- Immunofluorescence confocal microscopy on CAL-1 electroporated with BAD-LAMP mRNA and stimulated with fluorescent CpG A for indicated times. Images of VAMP3, LAMP1 and LAMP2 are shown and are representative of 3 independent experiments. Scale bars = 5µm. (Right) Quantification of VAMP3 and LAMP2 co-localisation at different time during CpG A stimulation was performed in mock transfected cells (black line as reference), upon BAD-LAMP mRNA electroporation (red line). Graphics represent Pearson's coefficient means of 50 different cells +/- SD from at least 3 independent experiments. E. Levels of TBK1 phosphorylation as MFI from FACS intracellular staining on CAL-1 non electroporated (black line) or electroporated (red line) with BAD-LAMP mRNA upon CpG A treatment. Data +/- SD from 2 independent experiments. \* indicates that p-value are below 0,05 (Student's T test).



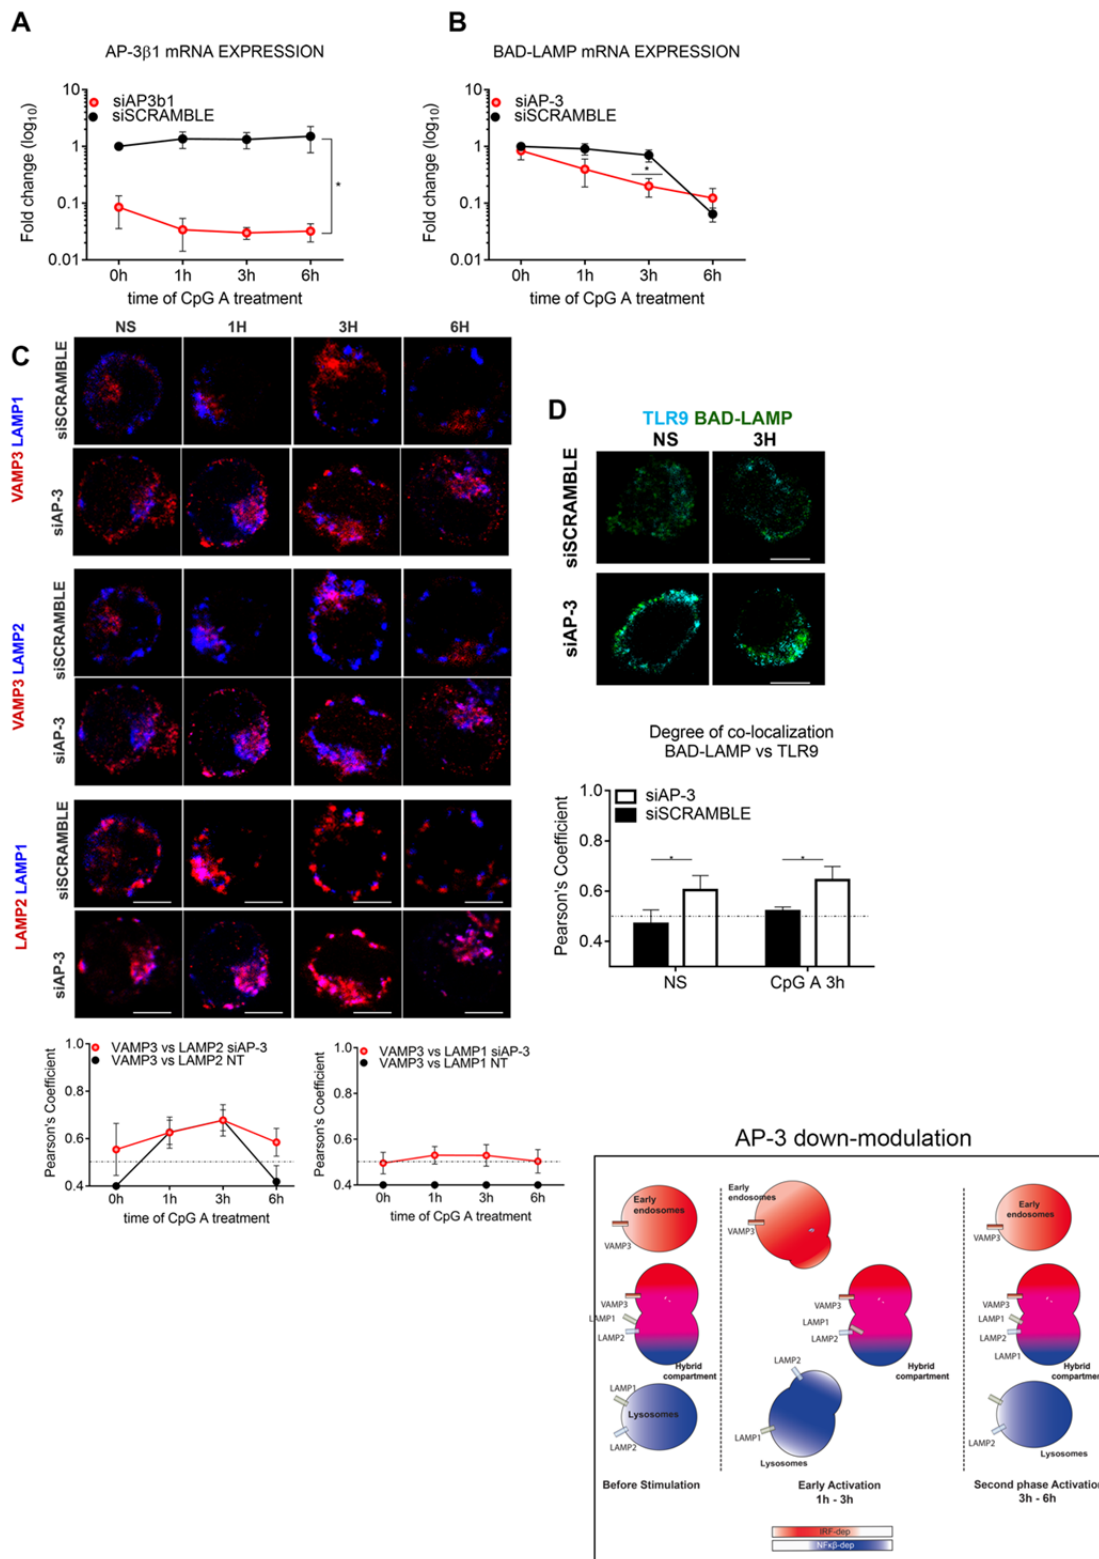

**Supplementary Figure 7: AP-3 controls endosomes dynamic and TLR9-BAD-LAMP intracellular transport.**

A. B. CAL-1 cells were electroporated with AP-3 siRNA or SCRAMBLE siRNA for 24hr prior stimulation during indicated times with CpG A. AP-3 $\beta$ 1 (A) and BAD-LAMP (B) mRNA level were monitored by RT-QPCR. Raw data have been normalized to housekeeping gene (GAPDH) and graphics represent fold change  $\pm$  SD compared to non-stimulated cells from 3 independent experiments. C. D. Immunofluorescence confocal microscopy on CAL-1 electroporated with SCRAMBLE siRNA, AP-3 $\beta$ 1 siRNA and then stimulated with CpG A for indicated times. Imaging of VAMP3, LAMP1 and LAMP2 (C) and TLR9 and BAD-LAMP (D) localization is shown. Arrows identify co-localization area. Scale bars = 5 $\mu$ m. Quantifications are shown at the bottom of the images. Graphic represents Pearson's coefficient mean for 50 different cells  $\pm$  SD from at least 3 independent experiments. A graphical abstract summarizing our results on the spatio-temporal endosomal organization in AP-3-silenced CAL-1 cells is shown. \* indicates that p-value are below 0,05 (Student's T test).

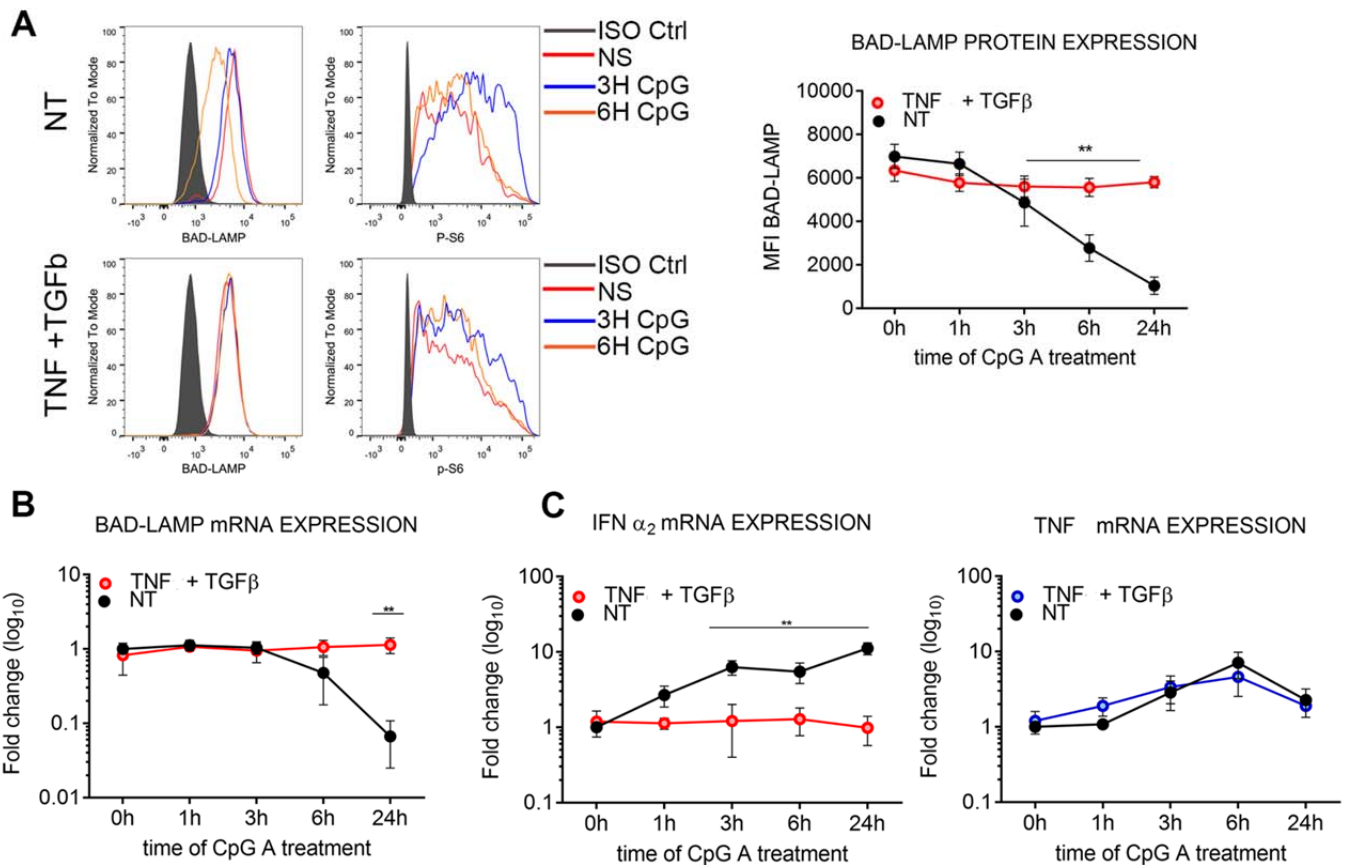

**Supplementary Figure 8: BAD-LAMP expression correlates with low IFN expression in TGF- $\beta$ -treated CAL-1 cells.**

A. *Left*) Histogram plots from FACS intracellular staining of BAD-LAMP (left) and the phosphorylated form of S6 ribosomal protein (use as control of activation, right) in CAL-1 at steady state (red line), 3h (blue line), 6h (orange line) after CpG A stimulation. Pre-treatment for 16h with TNF- $\alpha$  and TGF- $\beta$  was used to mimic breast tumor microenvironment inhibition on type-I IFN expression in activated pDCs (bottom panels). Full grey histograms represent isotype control. Data are representative of at least 3 independent experiments. *Right*) BAD-LAMP levels as MFI from FACS intracellular staining of CAL-1 stimulated with CpG A for indicated time with (red) or without (black) TNF $\alpha$  +TGF- $\beta$  pre-treatment. Means  $\pm$  SD from 3 independent experiments. B. C. BAD-LAMP (B), IFN- $\alpha_2$  (C left) and TNF- $\alpha$  (C right) mRNA expression in CAL-1 stimulated for indicated time with CpG A alone (black) or with CpG A and TNF- $\alpha$  +TGF- $\beta$  pretreatment (colored). Raw data have been normalized to housekeeping gene (GAPDH) and graphics represent fold change  $\pm$  SD compared to non-stimulated cells from 3 independent experiments. \* indicates that p-value are below 0,05 (Student's T test).

**Supplementary Table 1**

| REAGENT or RESOURCE                             | SOURCE                       | IDENTIFIER              |
|-------------------------------------------------|------------------------------|-------------------------|
| <b>Antibodies</b>                               |                              |                         |
| Anti-LAMP5 (1:100) clone 34,2                   | David et al 2007             | N/A                     |
| Anti-LAMP5-eFluor 660 (1/600) clone 34,2        | Thermo Fisher Scientific     | Catalog#: 50-9778-80    |
| Anti-hTLR9 (H100) (1/50)                        | Santa cruz                   | sc-25468                |
| Anti-UNC93B1 (E-12) (1/200)                     | Santa cruz                   | sc-135545               |
| Anti-VAMP3 (N-12) (1/100)                       | Santa cruz                   | sc-18208                |
| Anti-LAMP1-BV421 (1/100) clone H4A3             | Biolegend                    | Cat#328626              |
| Anti-STX6 (1/200)                               | BD Transduction Laboratories | #610636                 |
| Anti-LAMP2-AF647 (1/200) clone H4B4             | Thermo Fisher Scientific     | Cat#A15464              |
| Anti-human MYD88 (1/50)                         | R&D systems                  | Cat#AF2928              |
| Anti-S6 total (5G10) (1/1000)                   | Cell signalling              | #2217                   |
| Anti-pS6 (ser235/236) (D57.2.2E)                | Cell signalling              | #5364                   |
| Anti-IRF7total (1/200) (G-8 )                   | Santa cruz                   | sc74472                 |
| Anti-pIRF7 (Ser477) (1/100)                     | Cell signalling              | #12390                  |
| Anti-AKT total (1/1000)                         | Cell signalling              | #9272                   |
| Anti-pAKT (1/500)                               | Cell signalling              | #4060                   |
| Anti-FLAG (M2) (1/500)                          | Sigma Aldrich                | #F3165                  |
| Anti-TBK1total (1/1000)                         | Cell signalling              | #3013                   |
| Anti-pTBK1 (ser172) (1/1000)                    | Cell signalling              | #5483                   |
| Anti-P65 total (NfκB subunit) (C-20)            | Santa cruz                   | sc-372                  |
| Anti-pP65 (NfκB subunit) (Ser536)               | Cell signalling              | #3033                   |
| Anti STAT1 total                                | Cell signalling              | #9172                   |
| Anti-pSTAT1 (Y701) (58D6)                       | Cell signalling              | #9176                   |
| Anti βactin (AC74)                              | Sigma Aldrich                | #A2228                  |
| Anti BDCA4-PECY7 (1/500) (12C2)                 | Biolegend                    | #354507                 |
| Anti BDCA2-APC (1/500) (201A)                   | Biolegend                    | #354205                 |
| Anti-CD123-eFluor450 (1/100) (6H6)              | Thermo Fisher Scientific     | #48-1239-42             |
| Anti-HLA-DR PECY5 (1/100) (L243)                | Biolegend                    | #307607                 |
| Anti-IFNα-PE (1/10) (LT27:295)                  | Miltenyi Biotec              | #130-099-233            |
| Anti-TNFα-Alexa700 (1/100) (MAb11)              | Thermo Fisher Scientific     | #56-7349-42             |
| Anti-hIFNAR chain 2 (5ug/mL)                    | PBL                          | #21385-1                |
| <b>Bacterial Strain</b>                         |                              |                         |
| Top 10 chemically competent E.Coli              | Thermo Fisher Scientific     | #C404010                |
| HST08 chemically competent bacteria             | Takara                       | #636763                 |
| <b>Recombinant Proteins, Chemical Compounds</b> |                              |                         |
| Human rIFNβ (1U/mL)                             | PBL                          | #11410-2                |
| Human rTGFβ (10ng/mL)                           | R&D systems                  | #7754-BH/CF             |
| Human rIL-3 (1ng/mL)                            | R&D systems                  | #AAC08706               |
| Human rTNFα (1ng/mL)                            | R&D systems                  | #210-TA/CF              |
| Bafilomycin A1 (200uM)                          | VWR                          | #J61835.MX              |
| Z-FA-FMK (10uM)                                 | Sigma Aldrich                | #C1480, Park et al 2008 |
| CHLOROQUINE DIPHOSPHATE CRYSTALLINE (50uM)      | Sigma Aldrich                | #C6628                  |
| Tumor supernatant                               | Sisirak et al 2013           | N/A                     |
| ODN 2216 (CpG A) (5'-ggGGGACGA:TCGTCgggggg-3)   | Tebu-bio                     | N/A                     |

**Supplementary Table 2.**

| <b>Critical Commercial Assays</b>                        |                                       |                                                                                                                       |
|----------------------------------------------------------|---------------------------------------|-----------------------------------------------------------------------------------------------------------------------|
| hTNFa Elisa kit                                          | Thermo Fisher Scientific              | #88734676                                                                                                             |
| Verikine hIFN $\alpha$ ELISA kit (all subtypes)          | PBL                                   | #41410, Steinhagen et al 2012.                                                                                        |
| mMESSAGE mMACHINE T7 kit                                 | Thermo Fisher Scientific              | #AM1344                                                                                                               |
| Poly-A Tailling kit                                      | Thermo Fisher Scientific              | #AM1350                                                                                                               |
| Infusion cloning kit                                     | Takara                                | #638909                                                                                                               |
| Amaxa Kit V Nucleofector kit                             | Lonza                                 | #VACA-1003                                                                                                            |
| Plasmacytoid dendritic cell kit II negative purification | Miltenyi Biotec                       | 130-097-415, Sisirak et al 2013                                                                                       |
| RNeasy mini kit                                          | QIAGEN                                | #74104                                                                                                                |
| Rnase free DNase set                                     | QIAGEN                                | #79254                                                                                                                |
| Superscript II for RT                                    | Thermo Fisher Scientific              | #18064014                                                                                                             |
| Sybr green Premix ex TAQ II                              | Takara                                | #RR820A                                                                                                               |
| PLA anti mouse probe minus (Duolink)                     | Sigma Aldrich                         | #DUO92004                                                                                                             |
| PLA anti Rabbit probe plus (Duolink)                     | Sigma Aldrich                         | #DUO92002                                                                                                             |
| PLA anti-Goat probe minus (Duolink)                      | Sigma Aldrich                         | #DUO92006                                                                                                             |
| PLA wash buffers (Duolink)                               | Sigma Aldrich                         | #DUO82049                                                                                                             |
| PLA probe maker minus (Duolink)                          | Sigma Aldrich                         | #DUO92010                                                                                                             |
| PLA detection orange (Duolink)                           | Sigma Aldrich                         | # DUO92007                                                                                                            |
| <b>Recombinant DNA</b>                                   |                                       |                                                                                                                       |
| pGEM4Z-FLAG-hBAD-LAMP (LAMP5)                            | This paper                            | N/A                                                                                                                   |
| pGEM4Z-FLAG-hBAD-LAMP Y276A (LAMP5)                      | This paper                            | N/A                                                                                                                   |
| <b>Software</b>                                          |                                       |                                                                                                                       |
| ImageJ and JACOP plugin                                  | Rasband, W.S., ImageJ, U. S. NIH, USA | <a href="https://imagej.nih.gov/ij/">https://imagej.nih.gov/ij/</a> , 1997-2014)                                      |
| Imaris and coloc tool                                    | BITPLANE                              | <a href="http://www.bitplane.com/imaris">http://www.bitplane.com/imaris</a>                                           |
| Flowjo                                                   | flowjo,LLC                            | <a href="https://www.flowjo.com/solutions/flowjo">https://www.flowjo.com/solutions/flowjo</a>                         |
| LAS AF                                                   | LEICA                                 | <a href="http://www.leica-microsystems.com">http://www.leica-microsystems.com</a>                                     |
| Zen                                                      | ZEISS                                 | <a href="https://www.zeiss.fr/">https://www.zeiss.fr/</a>                                                             |
| 7500 QPCR analyser software                              | Thermo Fisher Scientific              | <a href="https://www.thermofisher.com/fr/">https://www.thermofisher.com/fr/</a>                                       |
| Graphpad prism                                           | GraphPad Software                     | <a href="https://www.graphpad.com/scientific-software/prism/">https://www.graphpad.com/scientific-software/prism/</a> |
| <b>Experimental model: Cell line</b>                     |                                       |                                                                                                                       |
| CAL-1 cell line                                          | Gift from Dr Maeda                    | Maeda et al. <i>International journal of hematology</i> 2005                                                          |

**Supplementary Table 3.**

| <b>Oligonucleotides</b>            |                   |          |
|------------------------------------|-------------------|----------|
| hBAD-LAMP                          | Defays et al 2011 | N/A      |
| Fwd : 5' GTGGCTTGGCTTTGACTCTC 3'   |                   |          |
| Rev : 5' AGGGGTTTCTCAAAGA 3'       |                   |          |
| GAPDH                              | This paper        | N/A      |
| Fwd : 5' CAGCCTCAAGATCATCATCAGCA3' |                   |          |
| Rev : 5'TGTGGTCATGAGTCCTTCCA 3'    |                   |          |
| OAS1                               | This paper        | N/A      |
| Fwd : 5' GTCTTCCTCAGTCCTCTCTCAC 3' |                   |          |
| Rev : 5' CTCTCTTTGACAGCTTC 3'      |                   |          |
| IFN $\alpha^2$                     | This paper        | N/A      |
| Fwd : 5' TGATCCAGCAGATCTTCAAT 3'   |                   |          |
| Rev : 5' CAGCTGCTGGTAGAGTTCA 3'    |                   |          |
| IFN $\beta^1$                      | This paper        | N/A      |
| Fwd : 5' TGCTTGGATTCTACAAAGA 3'    |                   |          |
| Rev : 5' GGATGTCAAAGTTCATCCTG 3'   |                   |          |
| TNF $\alpha$                       | This paper        | N/A      |
| Fwd : 5' CCCTCAGCAAGGACAGCAGA 3'   |                   |          |
| Rev : 5' AGCCGAGGGTCAGTATGTGAG 3'  |                   |          |
| AP-2 $\mu$ 1                       | This paper        | N/A      |
| Fwd : 5' CAAAGGCACAGCTGATGAAA 3'   |                   |          |
| Rev : 5' GTCCCACTTCTCGCACTAGC 3'   |                   |          |
| AP-3 $\beta$ 1                     | This paper        | N/A      |
| Fwd : 5' TTTTACCTGTGGCCATGTCA 3'   |                   |          |
| Rev : 5' AGGGACTGCACCTACATTGG 3'   |                   |          |
| siRNA against LAMP5 (Flexitubes)   | QIAGEN            | #GS24141 |
| siRNA against UNC93B1 (Flexitubes) | QIAGEN            | #GS81622 |
| siRNA against AP-3b1               | QIAGEN            | #GS8546  |

Supplementary Figure 9: Raw blots related to Fig. 1D

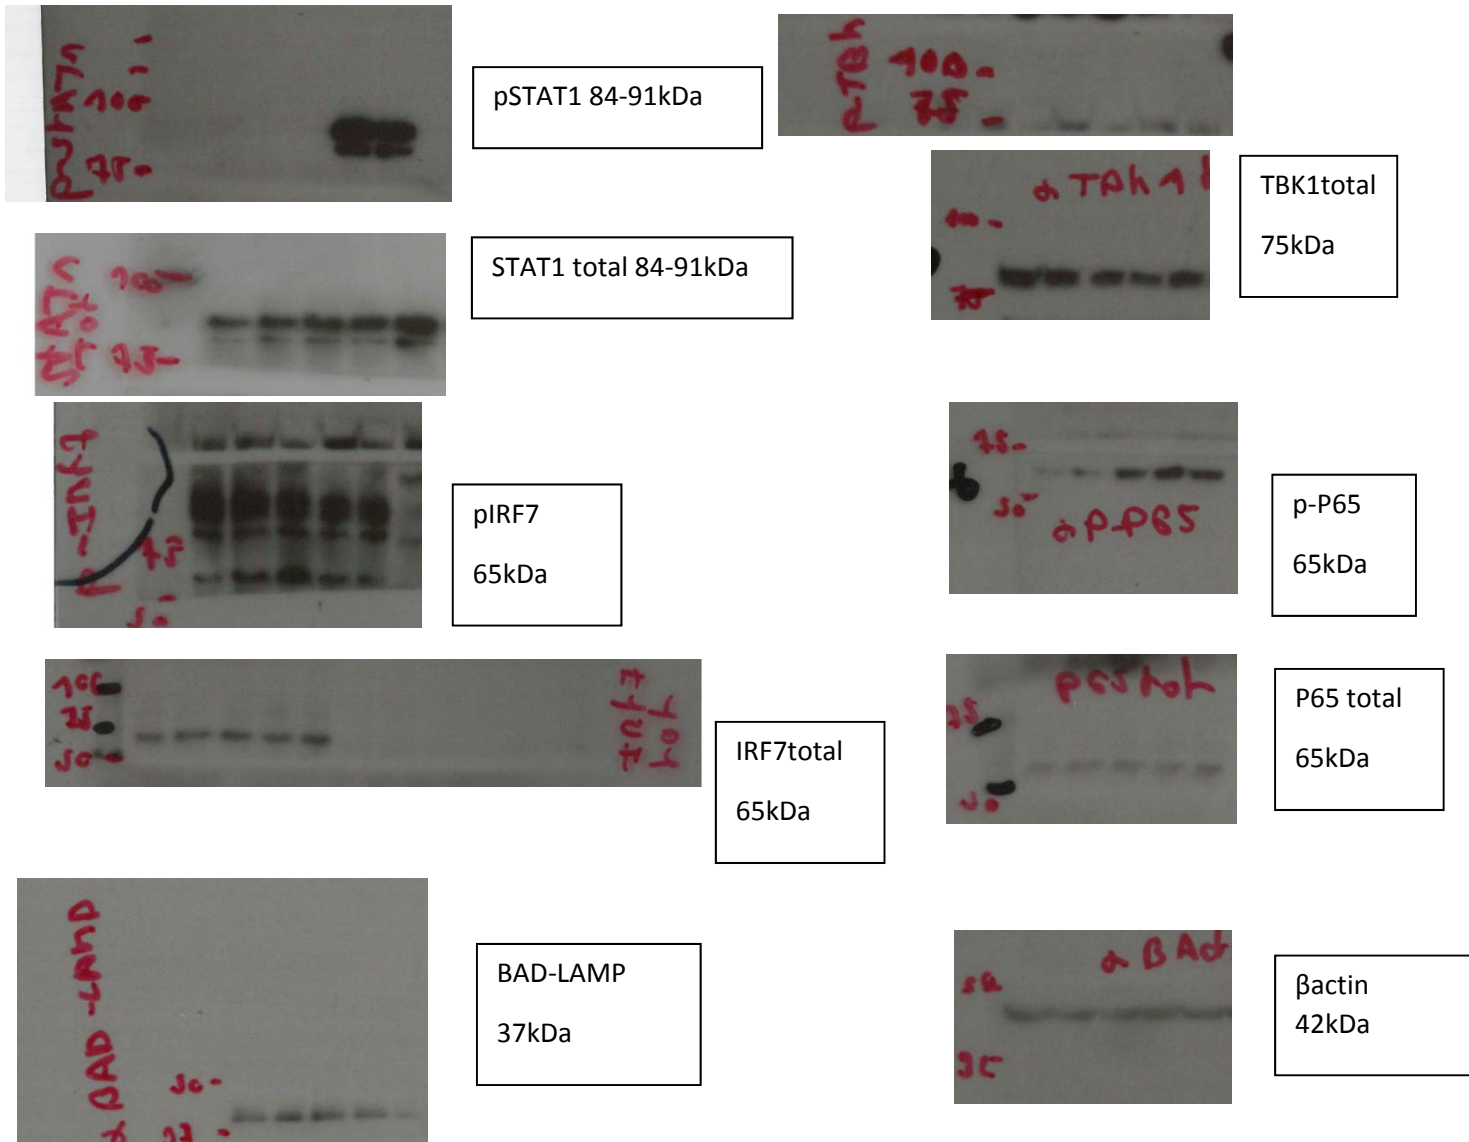

Supplementary Figure 10: Raw blots related to Fig. 1E

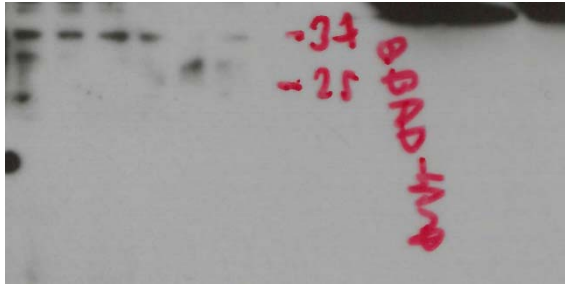

BAD-LAMP 37kDa

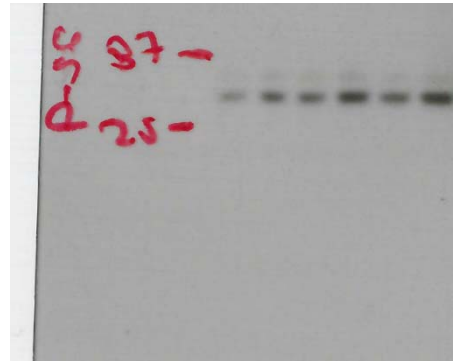

p-S6  
32kDa

$\beta$ -actin 42kDa

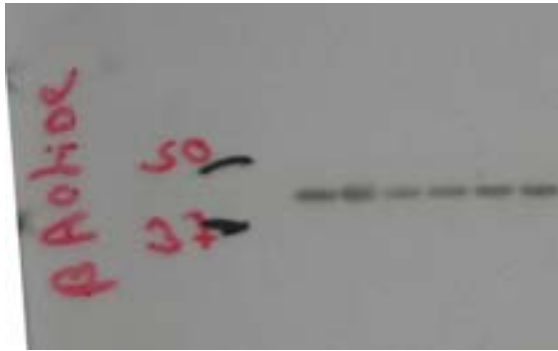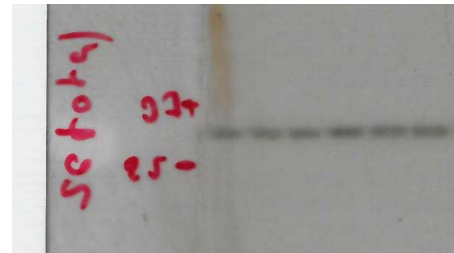

S6 total  
32kDa

Supplementary Figure 11: Raw blots related to Supplementary Figure 2E

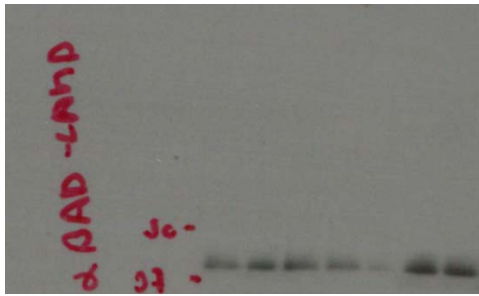

BAD-LAMP 37kDa

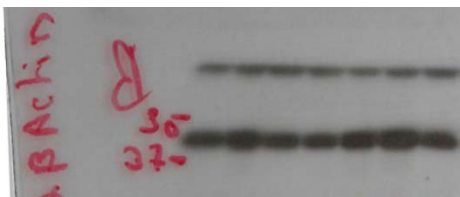

β-actin 42kDa



Supplementary Figure 12: Raw blots related to Fig. 5D

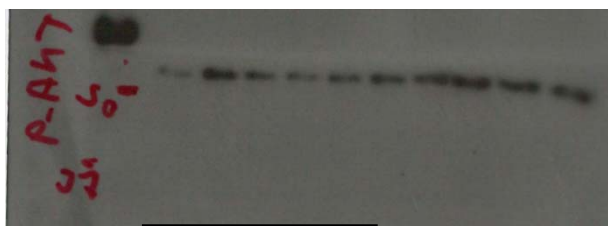

p-AKT 60kDa

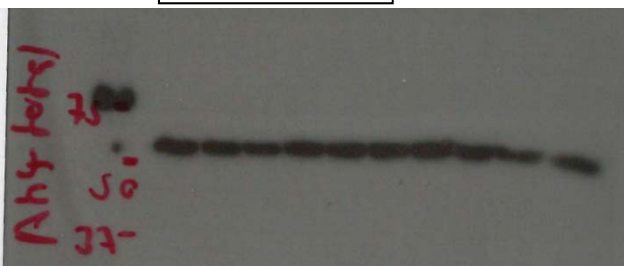

AKT total 60kDa

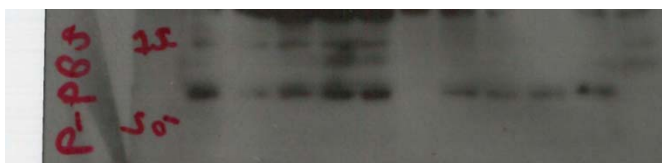

p-P65 65kDa

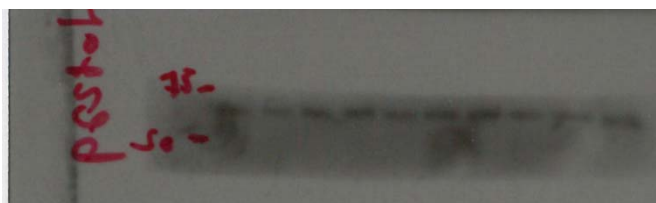

P65 total 65kDa

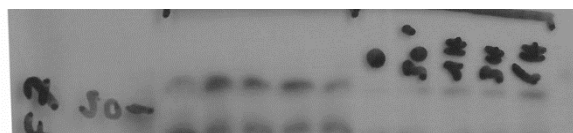

p-IRF7 65kDa

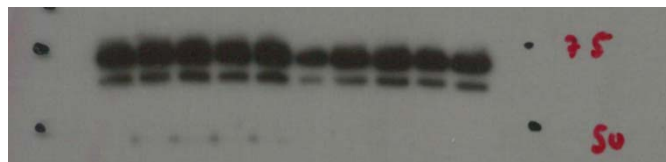

IRF7 total 65kDa

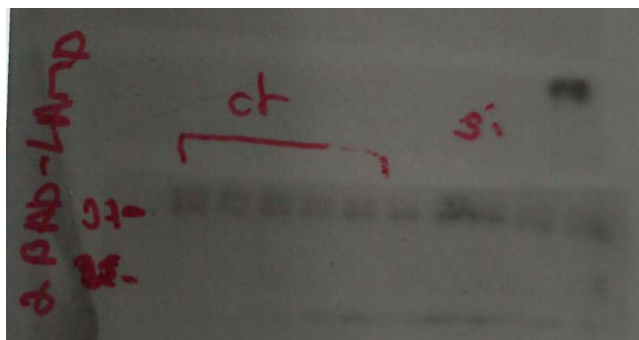

BAD-LAMP 37kDa

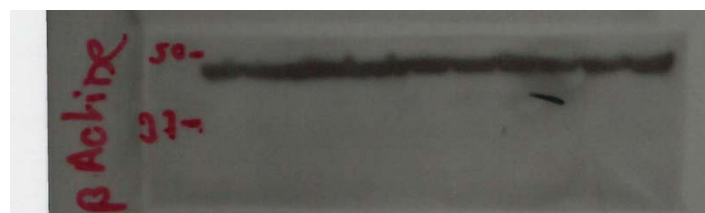

$\beta$ -actin 42kDa

Supplementary Figure 13: Raw blots related to Fig. 6F

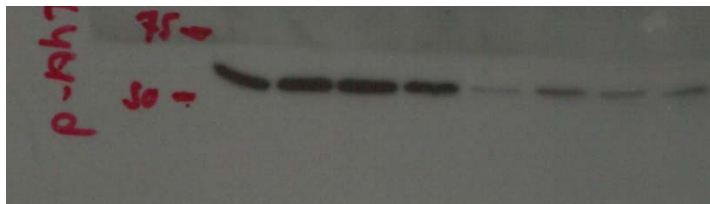

p-AKT 60kDa

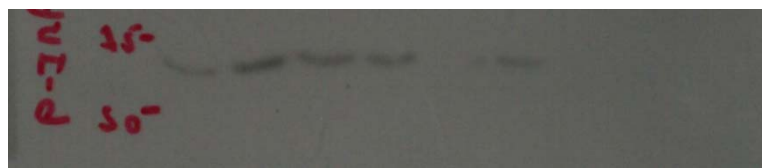

p-IRF7 65kDa

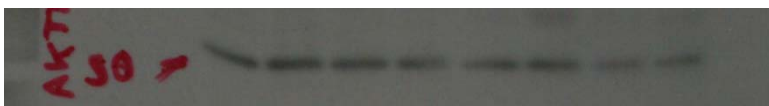

AKT total 60kDa

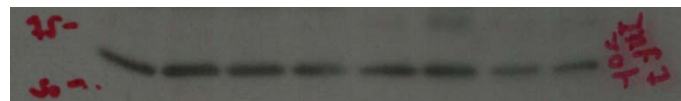

IRF7 total 65kDa

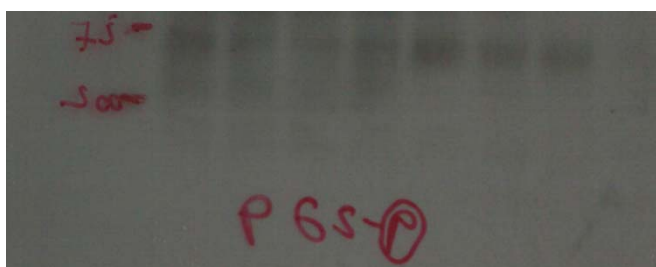

p-P65 65kDa

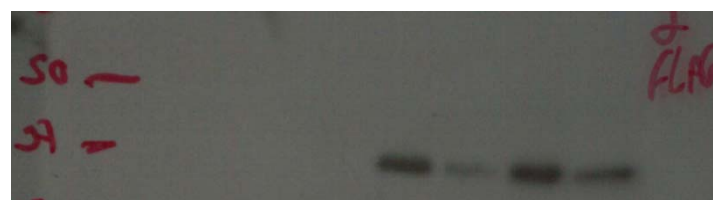

FLAG 37kDa

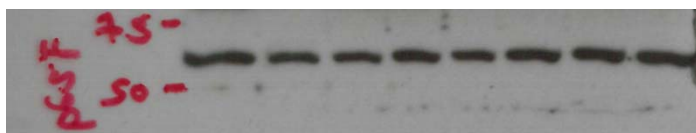

P65 total 65kDa

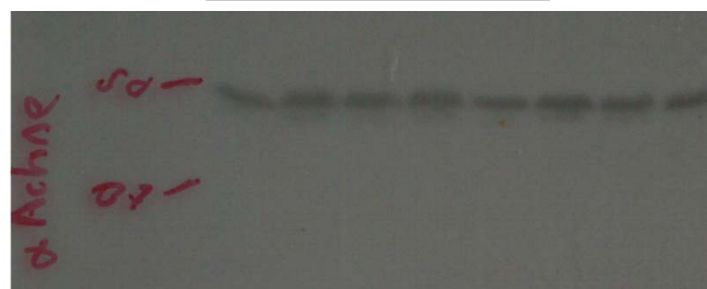

$\beta$ -actin 42kDa
